# Supplementary material for: Protease Inhibitor-Dependent Inhibition of Light-Induced Stomatal Opening
Source: Front Plant Sci. 2021 Sep 10;12:735328. doi: 10.3389/fpls.2021.735328 (PMC8462734; doi:10.3389/fpls.2021.735328)
Supplement: Supplementary file 2 [file Data_Sheet_2.xlsx]

## Sheet: Supplementary Figure 2.
SUPPLEMENTARY FIGURE 2. Effect of PIs from protease inhibitor library (130 inhibitors) on light-induced stomatal opening. Leaf discs were pre-treated with compounds for 30 min in the dark and then illuminated with light (150 μmol m−2 s−1 red light and 50 μmol m−2 s−1 blue light) for 3 h. We determined stomatal apertures of 30 stomata from 2 leaf discs per repeat. ABA, 10 µM; PIs, 100 µM. Seventee…
