# Supplementary material for: Protease Inhibitor-Dependent Inhibition of Light-Induced Stomatal Opening
Source: Front Plant Sci. 2021 Sep 10;12:735328. doi: 10.3389/fpls.2021.735328 (PMC8462734; doi:10.3389/fpls.2021.735328)
Supplement: Supplementary file 3 [file Data_Sheet_3.xlsx]

## Sheet: Supplementary Figure 3.
SUPPLEMENTARY FIGURE 3. Effect of PIs from protease inhibitor library (130 inhibitors) in the dark. Leaf discs were pre-incubated with compounds in basal buffer for 30 min and then incubated in the dark for 3 h. We determined stomatal apertures of 30 stomata from 2 leaf discs per repeat. FC, 10 µM; PIs, 100 µM. Experiments were repeated on three different occasions.
